# Supplementary material for: Fabrication of Au(111) single-crystal nanoisland-arrayed electrode ensembles by template-directed seeding growthElectronic supplementary information (ESI) available: cyclic voltammograms. See http://www.rsc.org/suppdata/cc/b2/b204231m/
Source: Royal Society of Chemistry journal article supplement (doi:10.1039/b204231m), 2002-07-16
Supplement: b204231m.doc [file b204231m.doc]

Supplementary Material (ESI) for Chemical Communications

This journal is © The Royal Society of Chemistry 2002


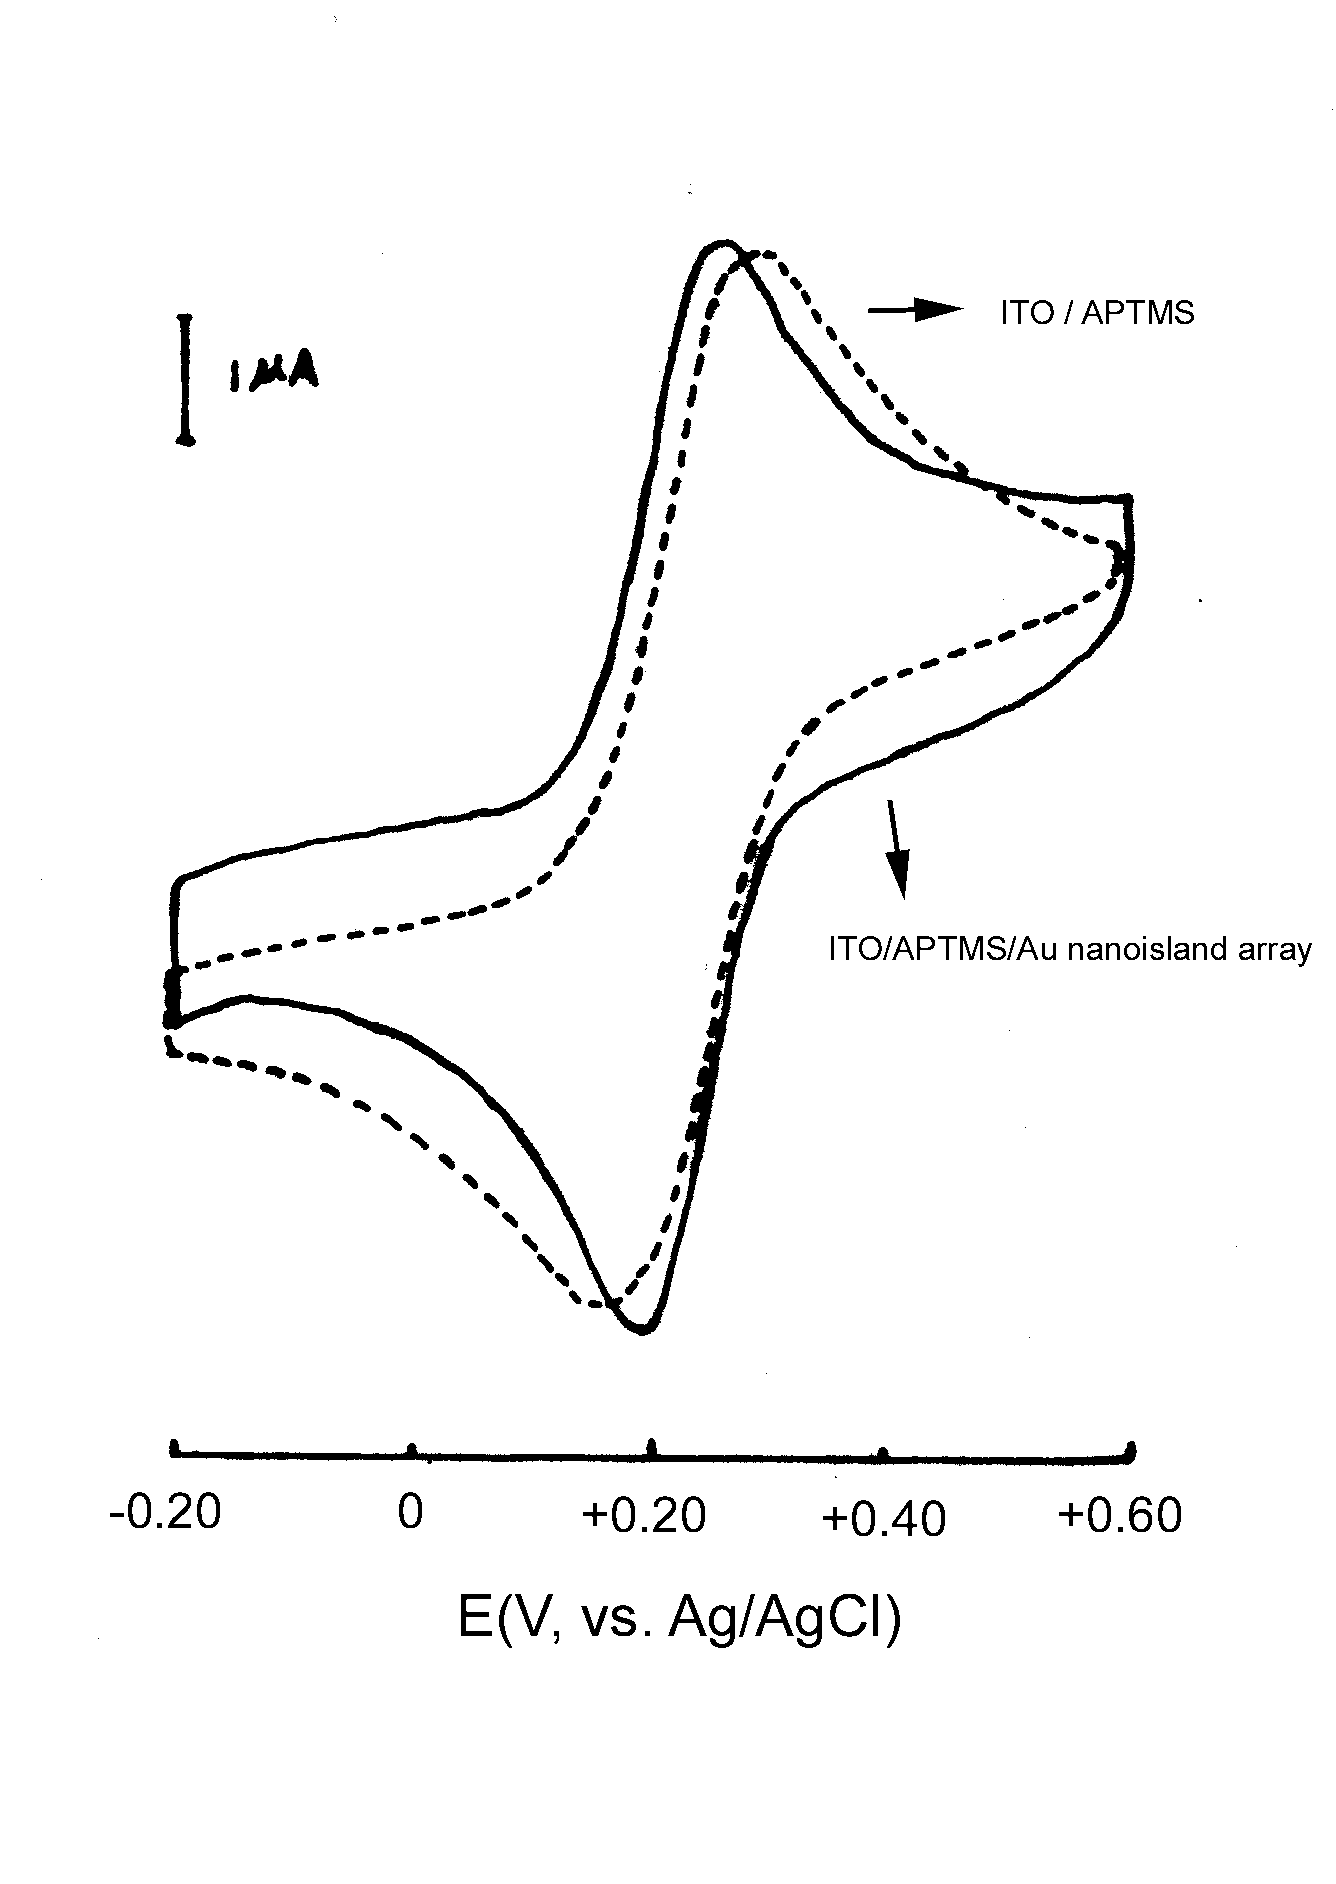


**Figure 1**. Cyclic Voltammograms at a ITO/APTMS and a ITO/APTMS/Au nanoisland array electrode with an area of ~0.40 cm2 recorded in 0.5 mM K3Fe(CN)6 + 0.10 M KCl at 100 mV/s.

**Figure 2.** Cyclic Voltammogram at a ITO/APTMS/ Au(2.5 nm) monolayer electrode with an area of ~0.40 cm2 recorded in 0.10 M H2SO4 at 10 mV/s.
